# Supplementary material for: Predictive binary mixture toxicity modeling of fluoroquinolones (FQs) and the projection of toxicity of hypothetical binary FQ mixtures: a combination of 2D-QSAR and machine-learning approaches
Source: Royal Society of Chemistry journal article supplement (doi:10.1039/d3em00445g), 2023-11-22
Supplement: d3em00445g1.pdf [file d3em00445g1.pdf]

# **Predictive binary mixture toxicity modeling of fluoroquinolones (FQ) and the projection of toxicity of hypothetical binary FQ mixtures: A combination of 2D-QSAR and machine-learning approaches**

**Mainak Chatterjee, Kunal Roy\***

*Drug Theoretics and Cheminformatics Laboratory, Department of Pharmaceutical Technology, Jadavpur University, Kolkata 700032, India.*

*E-mail: [kunalroy\\_in@yahoo.com](mailto:kunalroy_in@yahoo.com); [kunal.roy@jadavpuruniversity.in](mailto:kunal.roy@jadavpuruniversity.in)*

**\*Corresponding author**

**Supplementary Materials (Tables and Figures)**

**Table S1.** Toxicity data [Log (1/IC50) in molar scale] of mixture components (fluoroquinolones) along with their 2D structures

| Serial No. | Name (Abbreviation) | CS No.                      | 2D Structure                                                                          | Experimental toxicity [Log (1/IC50)] |
|------------|---------------------|-----------------------------|---------------------------------------------------------------------------------------|--------------------------------------|
| C1         | Ciprofloxacin (CIP) | <a href="#">85721-33-1</a>  | 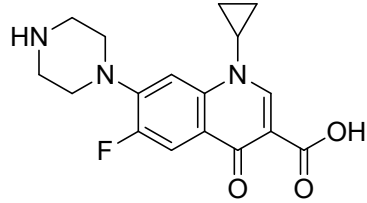   | 7.30                                 |
| C2         | Danofloxacin (DAN)  | <a href="#">112398-08-0</a> |    | 6.90                                 |
| C3         | Enoxacin (ENO)      | <a href="#">74011-58-8</a>  |    | 6.13                                 |
| C4         | Enrofloxacin (ENR)  | <a href="#">93106-60-6</a>  |   | 6.98                                 |
| C5         | Levofloxacin (LEV)  | <a href="#">100986-85-4</a> |  | 6.42                                 |

|     |                     |                             |                                                                                       |      |
|-----|---------------------|-----------------------------|---------------------------------------------------------------------------------------|------|
| C6  | Marbofloxacin (MAR) | <a href="#">115550-35-1</a> | 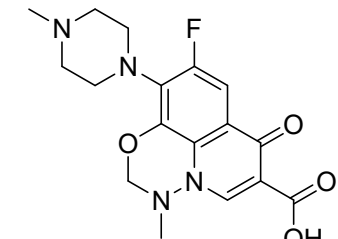   | 7.27 |
| C7  | Moxifloxacin (MOX)  | <a href="#">151096-09-2</a> |    | 6.71 |
| C8  | Norfloxacin (NOR)   | <a href="#">70458-96-7</a>  |    | 6.18 |
| C9  | Ofloxacin (OFL)     | <a href="#">82419-36-1</a>  |   | 6.74 |
| C10 | Orbifloxacin (ORB)  | <a href="#">113617-63-3</a> |  | 6.96 |

|     |                    |                             |                                                                                     |      |
|-----|--------------------|-----------------------------|-------------------------------------------------------------------------------------|------|
| C11 | Pefloxacin (PEF)   | <a href="#">70458-92-3</a>  | 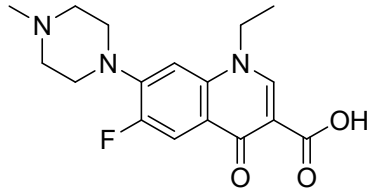 | 6.25 |
| C12 | Sarafloxacin (SAR) | <a href="#">98105-99-8</a>  |  | 7.10 |
| C13 | Sparfloxacin (SPA) | <a href="#">110871-86-8</a> |  | 7.32 |

**Table S2.** Composition and experimental toxicity data [Log (1/IC50) in molar scale] of studied mixtures

| Mixture No. | Comp. A | Mole Fraction | Comp. B | Mole Fraction | Experimental toxicity [Log (1/IC50)] |
|-------------|---------|---------------|---------|---------------|--------------------------------------|
| M1          | C1      | 0.28          | C2      | 0.72          | 7.05                                 |
| M2          | C1      | 0.06          | C3      | 0.94          | 6.43                                 |
| M3          | C1      | 0.32          | C4      | 0.68          | 7.27                                 |

---

|     |    |      |     |      |      |
|-----|----|------|-----|------|------|
| M4  | C1 | 0.12 | C5  | 0.88 | 6.71 |
| M5  | C1 | 0.48 | C6  | 0.52 | 7.28 |
| M6  | C1 | 0.2  | C7  | 0.8  | 6.84 |
| M7  | C1 | 0.07 | C8  | 0.93 | 6.34 |
| M8  | C1 | 0.22 | C9  | 0.78 | 6.99 |
| M9  | C1 | 0.31 | C10 | 0.69 | 7.27 |
| M10 | C1 | 0.08 | C11 | 0.92 | 6.56 |
| M11 | C1 | 0.39 | C12 | 0.61 | 7.2  |
| M12 | C1 | 0.51 | C13 | 0.49 | 7.4  |
| M13 | C2 | 0.15 | C3  | 0.85 | 6.51 |
| M14 | C2 | 0.55 | C4  | 0.45 | 7    |
| M15 | C2 | 0.25 | C5  | 0.75 | 6.64 |
| M16 | C2 | 0.7  | C6  | 0.3  | 7.02 |
| M17 | C2 | 0.39 | C7  | 0.61 | 6.96 |
| M18 | C2 | 0.16 | C8  | 0.84 | 6.48 |
| M19 | C2 | 0.41 | C9  | 0.59 | 6.78 |
| M20 | C2 | 0.53 | C10 | 0.47 | 7.18 |

---

---

|     |    |      |     |      |      |
|-----|----|------|-----|------|------|
| M21 | C2 | 0.18 | C11 | 0.82 | 6.52 |
| M22 | C2 | 0.61 | C12 | 0.39 | 7.27 |
| M23 | C2 | 0.72 | C13 | 0.28 | 7    |
| M24 | C3 | 0.88 | C4  | 0.12 | 6.5  |
| M25 | C3 | 0.66 | C5  | 0.34 | 6.47 |
| M26 | C3 | 0.93 | C6  | 0.07 | 6.42 |
| M27 | C3 | 0.79 | C7  | 0.21 | 6.25 |
| M28 | C3 | 0.53 | C8  | 0.47 | 6.16 |
| M29 | C3 | 0.8  | C9  | 0.2  | 6.37 |
| M30 | C3 | 0.87 | C10 | 0.13 | 6.39 |
| M31 | C3 | 0.57 | C11 | 0.43 | 6.39 |
| M32 | C3 | 0.9  | C12 | 0.1  | 6.47 |
| M33 | C3 | 0.94 | C13 | 0.06 | 6.41 |
| M34 | C4 | 0.22 | C5  | 0.78 | 6.82 |
| M35 | C4 | 0.66 | C6  | 0.34 | 7.05 |
| M36 | C4 | 0.35 | C7  | 0.65 | 6.87 |
| M37 | C4 | 0.14 | C8  | 0.86 | 6.54 |

---

---

|     |    |      |     |      |      |
|-----|----|------|-----|------|------|
| M38 | C4 | 0.37 | C9  | 0.63 | 6.98 |
| M39 | C4 | 0.49 | C10 | 0.51 | 6.93 |
| M40 | C4 | 0.16 | C11 | 0.84 | 6.8  |
| M41 | C4 | 0.57 | C12 | 0.43 | 7.2  |
| M42 | C4 | 0.69 | C13 | 0.31 | 7.21 |
| M43 | C5 | 0.88 | C6  | 0.12 | 6.52 |
| M44 | C5 | 0.66 | C7  | 0.34 | 6.78 |
| M45 | C5 | 0.37 | C8  | 0.63 | 6.24 |
| M46 | C5 | 0.68 | C9  | 0.32 | 6.46 |
| M47 | C5 | 0.78 | C10 | 0.22 | 6.77 |
| M48 | C5 | 0.4  | C11 | 0.6  | 6.39 |
| M49 | C5 | 0.83 | C12 | 0.17 | 6.49 |
| M50 | C5 | 0.89 | C13 | 0.11 | 6.54 |
| M51 | C6 | 0.22 | C7  | 0.78 | 6.94 |
| M52 | C6 | 0.08 | C8  | 0.92 | 6.36 |
| M53 | C6 | 0.23 | C9  | 0.77 | 6.98 |
| M54 | C6 | 0.33 | C10 | 0.67 | 7.06 |

---

---

|     |    |      |     |      |      |
|-----|----|------|-----|------|------|
| M55 | C6 | 0.09 | C11 | 0.91 | 6.86 |
| M56 | C6 | 0.4  | C12 | 0.6  | 7.17 |
| M57 | C6 | 0.53 | C13 | 0.47 | 7.24 |
| M58 | C7 | 0.23 | C8  | 0.77 | 6.43 |
| M59 | C7 | 0.52 | C9  | 0.48 | 6.69 |
| M60 | C7 | 0.64 | C10 | 0.36 | 6.94 |
| M61 | C7 | 0.26 | C11 | 0.74 | 6.62 |
| M62 | C7 | 0.71 | C12 | 0.29 | 6.71 |
| M63 | C7 | 0.8  | C13 | 0.2  | 6.7  |
| M64 | C8 | 0.78 | C9  | 0.22 | 6.43 |
| M65 | C8 | 0.86 | C10 | 0.14 | 6.48 |
| M66 | C8 | 0.54 | C11 | 0.46 | 6.4  |
| M67 | C8 | 0.89 | C12 | 0.11 | 6.44 |
| M68 | C8 | 0.93 | C13 | 0.07 | 6.39 |
| M69 | C9 | 0.62 | C10 | 0.38 | 6.78 |
| M70 | C9 | 0.24 | C11 | 0.76 | 6.57 |
| M71 | C9 | 0.7  | C12 | 0.3  | 6.85 |

---



|     |     |      |     |      |      |
|-----|-----|------|-----|------|------|
| M72 | C9  | 0.79 | C13 | 0.21 | 6.98 |
| M73 | C10 | 0.16 | C11 | 0.84 | 6.6  |
| M74 | C10 | 0.58 | C12 | 0.42 | 7.01 |
| M75 | C10 | 0.7  | C13 | 0.3  | 7.09 |
| M76 | C11 | 0.88 | C12 | 0.12 | 6.5  |
| M77 | C11 | 0.92 | C13 | 0.08 | 6.63 |
| M78 | C12 | 0.62 | C13 | 0.38 | 7.07 |

**Table S3.** Computed validation metrics of preliminary GA-MLR models (Number of descriptors in each model = 6)

| <b>Mixing rule 1 (Linear combination of molecular contributions)</b> |                         |                               |                                    |                              |                                   |  |
|----------------------------------------------------------------------|-------------------------|-------------------------------|------------------------------------|------------------------------|-----------------------------------|--|
| <b>Division</b>                                                      | <b><math>R^2</math></b> | <b><math>Q^2_{LOO}</math></b> | <b><math>ME_{Train95\%}</math></b> | <b><math>Q^2_{FI}</math></b> | <b><math>ME_{Test95\%}</math></b> |  |
| 4-1ABD                                                               | 0.897                   | 0.870                         | 0.081                              | 0.809                        | 0.097                             |  |
| 4-1DBD                                                               | 0.886                   | 0.856                         | 0.082                              | 0.817                        | 0.106                             |  |
| <b>4-2ABD</b>                                                        | <b>0.874</b>            | <b>0.842</b>                  | <b>0.087</b>                       | <b>0.837</b>                 | <b>0.088</b>                      |  |
| 4-2DBD                                                               | 0.863                   | 0.828                         | 0.089                              | 0.889                        | 0.084                             |  |
| 4-3ABD                                                               | 0.880                   | 0.850                         | 0.088                              | 0.833                        | 0.092                             |  |
| 4-3DBD                                                               | 0.874                   | 0.844                         | 0.092                              | 0.863                        | 0.072                             |  |
| 4-4ABD                                                               | 0.884                   | 0.857                         | 0.085                              | 0.833                        | 0.086                             |  |
| 4-4DBD                                                               | 0.887                   | 0.858                         | 0.084                              | 0.827                        | 0.092                             |  |

|                |              |              |              |              |              |
|----------------|--------------|--------------|--------------|--------------|--------------|
| 75-25KS        | 0.901        | 0.875        | 0.082        | 0.733        | 0.102        |
| <b>Average</b> | <b>0.883</b> | <b>0.853</b> | <b>0.085</b> | <b>0.827</b> | <b>0.091</b> |

**Mixing rule 2 (Square molecular contributions)**

| <i>Division</i> | <i>R<sup>2</sup></i> | <i>Q<sup>2</sup><sub>LOO</sub></i> | <i>ME<sub>Train95%</sub></i> | <i>Q<sup>2</sup><sub>F1</sub></i> | <i>ME<sub>Test95%</sub></i> |
|-----------------|----------------------|------------------------------------|------------------------------|-----------------------------------|-----------------------------|
| 4-1ABD          | 0.890                | 0.861                              | 0.079                        | 0.774                             | 0.103                       |
| 4-1DBD          | 0.858                | 0.822                              | 0.092                        | 0.840                             | 0.085                       |
| 4-2ABD          | 0.863                | 0.827                              | 0.088                        | 0.825                             | 0.090                       |
| 4-2DBD          | 0.872                | 0.838                              | 0.090                        | 0.751                             | 0.092                       |
| 4-3ABD          | 0.877                | 0.846                              | 0.084                        | 0.810                             | 0.091                       |
| 4-3DBD          | 0.878                | 0.847                              | 0.081                        | 0.734                             | 0.117                       |
| 4-4ABD          | 0.865                | 0.829                              | 0.088                        | 0.815                             | 0.091                       |
| 4-4DBD          | 0.869                | 0.835                              | 0.083                        | 0.801                             | 0.107                       |
| 75-25KS         | 0.882                | 0.852                              | 0.087                        | 0.762                             | 0.091                       |
| <b>Average</b>  | <b>0.873</b>         | <b>0.840</b>                       | <b>0.086</b>                 | <b>0.790</b>                      | <b>0.096</b>                |

**Mixing rule 3 (Norm of molecular contributions)**

| <b>Division</b> | <i>R<sup>2</sup></i> | <i>Q<sup>2</sup><sub>LOO</sub></i> | <i>ME<sub>Train95%</sub></i> | <i>Q<sup>2</sup><sub>F1</sub></i> | <i>ME<sub>Test95%</sub></i> |
|-----------------|----------------------|------------------------------------|------------------------------|-----------------------------------|-----------------------------|
| 4-1ABD          | 0.865                | 0.829                              | 0.088                        | 0.767                             | 0.099                       |
| 4-1DBD          | 0.829                | 0.778                              | 0.099                        | 0.773                             | 0.098                       |
| 4-2ABD          | 0.829                | 0.783                              | 0.100                        | 0.765                             | 0.102                       |
| 4-2DBD          | 0.862                | 0.823                              | 0.083                        | 0.737                             | 0.141                       |
| 4-3ABD          | 0.835                | 0.782                              | 0.097                        | 0.817                             | 0.095                       |

|                |       |       |       |       |       |
|----------------|-------|-------|-------|-------|-------|
| 4-3DBD         | 0.888 | 0.858 | 0.083 | 0.644 | 0.121 |
| 4-4ABD         | 0.887 | 0.857 | 0.076 | 0.576 | 0.130 |
| 4-4DBD         | 0.849 | 0.806 | 0.096 | 0.764 | 0.089 |
| 75-25KS        | 0.864 | 0.820 | 0.089 | 0.744 | 0.100 |
| <b>Average</b> | 0.856 | 0.815 | 0.090 | 0.732 | 0.108 |

**Table S4.** Composition of the hypothetical mixtures designed from the FQs and their corresponding degradation products

| Hypothetical Mixture No. | COMP. 1 | FRACTION 1 | COMP. 2 | FRACTION 2 |
|--------------------------|---------|------------|---------|------------|
| HM1                      | CIP     | 0.5        | CIP1    | 0.5        |
| HM2                      | CIP     | 0.5        | CIP2    | 0.5        |
| HM3                      | CIP     | 0.5        | CIP3    | 0.5        |
| HM4                      | CIP     | 0.5        | CIP4    | 0.5        |
| HM5                      | CIP     | 0.5        | CIP5    | 0.5        |
| HM6                      | CIP     | 0.5        | CIP6    | 0.5        |
| HM7                      | CIP     | 0.5        | CIP7    | 0.5        |
| HM8                      | CIP     | 0.5        | CIP8    | 0.5        |
| HM9                      | CIP     | 0.5        | CIP9    | 0.5        |
| HM10                     | CIP1    | 0.5        | CIP2    | 0.5        |
| HM11                     | CIP1    | 0.5        | CIP3    | 0.5        |

---

|      |      |     |      |     |
|------|------|-----|------|-----|
| HM12 | CIP1 | 0.5 | CIP4 | 0.5 |
| HM13 | CIP1 | 0.5 | CIP5 | 0.5 |
| HM14 | CIP1 | 0.5 | CIP6 | 0.5 |
| HM15 | CIP1 | 0.5 | CIP7 | 0.5 |
| HM16 | CIP1 | 0.5 | CIP8 | 0.5 |
| HM17 | CIP1 | 0.5 | CIP9 | 0.5 |
| HM18 | CIP2 | 0.5 | CIP3 | 0.5 |
| HM19 | CIP2 | 0.5 | CIP4 | 0.5 |
| HM20 | CIP2 | 0.5 | CIP5 | 0.5 |
| HM21 | CIP2 | 0.5 | CIP6 | 0.5 |
| HM22 | CIP2 | 0.5 | CIP7 | 0.5 |
| HM23 | CIP2 | 0.5 | CIP8 | 0.5 |
| HM24 | CIP2 | 0.5 | CIP9 | 0.5 |
| HM25 | CIP3 | 0.5 | CIP4 | 0.5 |
| HM26 | CIP3 | 0.5 | CIP5 | 0.5 |
| HM27 | CIP3 | 0.5 | CIP6 | 0.5 |
| HM28 | CIP3 | 0.5 | CIP7 | 0.5 |
| HM29 | CIP3 | 0.5 | CIP8 | 0.5 |
| HM30 | CIP3 | 0.5 | CIP9 | 0.5 |

---

---

|      |      |     |      |     |
|------|------|-----|------|-----|
| HM31 | CIP4 | 0.5 | CIP5 | 0.5 |
| HM32 | CIP4 | 0.5 | CIP6 | 0.5 |
| HM33 | CIP4 | 0.5 | CIP7 | 0.5 |
| HM34 | CIP4 | 0.5 | CIP8 | 0.5 |
| HM35 | CIP4 | 0.5 | CIP9 | 0.5 |
| HM36 | CIP5 | 0.5 | CIP6 | 0.5 |
| HM37 | CIP5 | 0.5 | CIP7 | 0.5 |
| HM38 | CIP5 | 0.5 | CIP8 | 0.5 |
| HM39 | CIP5 | 0.5 | CIP9 | 0.5 |
| HM40 | CIP6 | 0.5 | CIP7 | 0.5 |
| HM41 | CIP6 | 0.5 | CIP8 | 0.5 |
| HM42 | CIP6 | 0.5 | CIP9 | 0.5 |
| HM43 | CIP7 | 0.5 | CIP8 | 0.5 |
| HM44 | CIP7 | 0.5 | CIP9 | 0.5 |
| HM45 | CIP8 | 0.5 | CIP9 | 0.5 |
| HM46 | DAN  | 0.5 | DAN1 | 0.5 |
| HM47 | DAN  | 0.5 | DAN2 | 0.5 |
| HM48 | DAN  | 0.5 | DAN3 | 0.5 |
| HM49 | DAN  | 0.5 | DAN4 | 0.5 |

---

---

|      |      |     |      |     |
|------|------|-----|------|-----|
| HM50 | DAN  | 0.5 | DAN5 | 0.5 |
| HM51 | DAN  | 0.5 | DAN6 | 0.5 |
| HM52 | DAN  | 0.5 | DAN7 | 0.5 |
| HM53 | DAN  | 0.5 | DAN8 | 0.5 |
| HM54 | DAN  | 0.5 | DAN9 | 0.5 |
| HM55 | DAN1 | 0.5 | DAN2 | 0.5 |
| HM56 | DAN1 | 0.5 | DAN3 | 0.5 |
| HM57 | DAN1 | 0.5 | DAN4 | 0.5 |
| HM58 | DAN1 | 0.5 | DAN5 | 0.5 |
| HM59 | DAN1 | 0.5 | DAN6 | 0.5 |
| HM60 | DAN1 | 0.5 | DAN7 | 0.5 |
| HM61 | DAN1 | 0.5 | DAN8 | 0.5 |
| HM62 | DAN1 | 0.5 | DAN9 | 0.5 |
| HM63 | DAN2 | 0.5 | DAN3 | 0.5 |
| HM64 | DAN2 | 0.5 | DAN4 | 0.5 |
| HM65 | DAN2 | 0.5 | DAN5 | 0.5 |
| HM66 | DAN2 | 0.5 | DAN6 | 0.5 |
| HM67 | DAN2 | 0.5 | DAN7 | 0.5 |
| HM68 | DAN2 | 0.5 | DAN8 | 0.5 |

---

---

|      |      |     |      |     |
|------|------|-----|------|-----|
| HM69 | DAN2 | 0.5 | DAN9 | 0.5 |
| HM70 | DAN3 | 0.5 | DAN4 | 0.5 |
| HM71 | DAN3 | 0.5 | DAN5 | 0.5 |
| HM72 | DAN3 | 0.5 | DAN6 | 0.5 |
| HM73 | DAN3 | 0.5 | DAN7 | 0.5 |
| HM74 | DAN3 | 0.5 | DAN8 | 0.5 |
| HM75 | DAN3 | 0.5 | DAN9 | 0.5 |
| HM76 | DAN4 | 0.5 | DAN5 | 0.5 |
| HM77 | DAN4 | 0.5 | DAN6 | 0.5 |
| HM78 | DAN4 | 0.5 | DAN7 | 0.5 |
| HM79 | DAN4 | 0.5 | DAN8 | 0.5 |
| HM80 | DAN4 | 0.5 | DAN9 | 0.5 |
| HM81 | DAN5 | 0.5 | DAN6 | 0.5 |
| HM82 | DAN5 | 0.5 | DAN7 | 0.5 |
| HM83 | DAN5 | 0.5 | DAN8 | 0.5 |
| HM84 | DAN5 | 0.5 | DAN9 | 0.5 |
| HM85 | DAN6 | 0.5 | DAN7 | 0.5 |
| HM86 | DAN6 | 0.5 | DAN8 | 0.5 |
| HM87 | DAN6 | 0.5 | DAN9 | 0.5 |

---

---

|       |      |     |      |     |
|-------|------|-----|------|-----|
| HM88  | DAN7 | 0.5 | DAN8 | 0.5 |
| HM89  | DAN7 | 0.5 | DAN9 | 0.5 |
| HM90  | DAN8 | 0.5 | DAN9 | 0.5 |
| HM91  | ENO  | 0.5 | ENO1 | 0.5 |
| HM92  | ENO  | 0.5 | ENO2 | 0.5 |
| HM93  | ENO  | 0.5 | ENO3 | 0.5 |
| HM94  | ENO  | 0.5 | ENO4 | 0.5 |
| HM95  | ENO  | 0.5 | ENO5 | 0.5 |
| HM96  | ENO  | 0.5 | ENO6 | 0.5 |
| HM97  | ENO  | 0.5 | ENO7 | 0.5 |
| HM98  | ENO  | 0.5 | ENO8 | 0.5 |
| HM99  | ENO  | 0.5 | ENO9 | 0.5 |
| HM100 | ENO1 | 0.5 | ENO2 | 0.5 |
| HM101 | ENO1 | 0.5 | ENO3 | 0.5 |
| HM102 | ENO1 | 0.5 | ENO4 | 0.5 |
| HM103 | ENO1 | 0.5 | ENO5 | 0.5 |
| HM104 | ENO1 | 0.5 | ENO6 | 0.5 |
| HM105 | ENO1 | 0.5 | ENO7 | 0.5 |
| HM106 | ENO1 | 0.5 | ENO8 | 0.5 |

---



---

|       |      |     |      |     |
|-------|------|-----|------|-----|
| HM107 | ENO1 | 0.5 | ENO9 | 0.5 |
| HM108 | ENO2 | 0.5 | ENO3 | 0.5 |
| HM109 | ENO2 | 0.5 | ENO4 | 0.5 |
| HM110 | ENO2 | 0.5 | ENO5 | 0.5 |
| HM111 | ENO2 | 0.5 | ENO6 | 0.5 |
| HM112 | ENO2 | 0.5 | ENO7 | 0.5 |
| HM113 | ENO2 | 0.5 | ENO8 | 0.5 |
| HM114 | ENO2 | 0.5 | ENO9 | 0.5 |
| HM115 | ENO3 | 0.5 | ENO4 | 0.5 |
| HM116 | ENO3 | 0.5 | ENO5 | 0.5 |
| HM117 | ENO3 | 0.5 | ENO6 | 0.5 |
| HM118 | ENO3 | 0.5 | ENO7 | 0.5 |
| HM119 | ENO3 | 0.5 | ENO8 | 0.5 |
| HM120 | ENO3 | 0.5 | ENO9 | 0.5 |
| HM121 | ENO4 | 0.5 | ENO5 | 0.5 |
| HM122 | ENO4 | 0.5 | ENO6 | 0.5 |
| HM123 | ENO4 | 0.5 | ENO7 | 0.5 |
| HM124 | ENO4 | 0.5 | ENO8 | 0.5 |
| HM125 | ENO4 | 0.5 | ENO9 | 0.5 |

---

---

|       |      |     |      |     |
|-------|------|-----|------|-----|
| HM126 | ENO5 | 0.5 | ENO6 | 0.5 |
| HM127 | ENO5 | 0.5 | ENO7 | 0.5 |
| HM128 | ENO5 | 0.5 | ENO8 | 0.5 |
| HM129 | ENO5 | 0.5 | ENO9 | 0.5 |
| HM130 | ENO6 | 0.5 | ENO7 | 0.5 |
| HM131 | ENO6 | 0.5 | ENO8 | 0.5 |
| HM132 | ENO6 | 0.5 | ENO9 | 0.5 |
| HM133 | ENO7 | 0.5 | ENO8 | 0.5 |
| HM134 | ENO7 | 0.5 | ENO9 | 0.5 |
| HM135 | ENO8 | 0.5 | ENO9 | 0.5 |
| HM136 | ENR  | 0.5 | ENR1 | 0.5 |
| HM137 | ENR  | 0.5 | ENR2 | 0.5 |
| HM138 | ENR  | 0.5 | ENR3 | 0.5 |
| HM139 | ENR  | 0.5 | ENR4 | 0.5 |
| HM140 | ENR  | 0.5 | ENR5 | 0.5 |
| HM141 | ENR  | 0.5 | ENR6 | 0.5 |
| HM142 | ENR  | 0.5 | ENR7 | 0.5 |
| HM143 | ENR  | 0.5 | ENR8 | 0.5 |
| HM144 | ENR  | 0.5 | ENR9 | 0.5 |

---

---

|       |      |     |      |     |
|-------|------|-----|------|-----|
| HM145 | ENR1 | 0.5 | ENR2 | 0.5 |
| HM146 | ENR1 | 0.5 | ENR3 | 0.5 |
| HM147 | ENR1 | 0.5 | ENR4 | 0.5 |
| HM148 | ENR1 | 0.5 | ENR5 | 0.5 |
| HM149 | ENR1 | 0.5 | ENR6 | 0.5 |
| HM150 | ENR1 | 0.5 | ENR7 | 0.5 |
| HM151 | ENR1 | 0.5 | ENR8 | 0.5 |
| HM152 | ENR1 | 0.5 | ENR9 | 0.5 |
| HM153 | ENR2 | 0.5 | ENR3 | 0.5 |
| HM154 | ENR2 | 0.5 | ENR4 | 0.5 |
| HM155 | ENR2 | 0.5 | ENR5 | 0.5 |
| HM156 | ENR2 | 0.5 | ENR6 | 0.5 |
| HM157 | ENR2 | 0.5 | ENR7 | 0.5 |
| HM158 | ENR2 | 0.5 | ENR8 | 0.5 |
| HM159 | ENR2 | 0.5 | ENR9 | 0.5 |
| HM160 | ENR3 | 0.5 | ENR4 | 0.5 |
| HM161 | ENR3 | 0.5 | ENR5 | 0.5 |
| HM162 | ENR3 | 0.5 | ENR6 | 0.5 |
| HM163 | ENR3 | 0.5 | ENR7 | 0.5 |

---

---

|       |      |     |      |     |
|-------|------|-----|------|-----|
| HM164 | ENR3 | 0.5 | ENR8 | 0.5 |
| HM165 | ENR3 | 0.5 | ENR9 | 0.5 |
| HM166 | ENR4 | 0.5 | ENR5 | 0.5 |
| HM167 | ENR4 | 0.5 | ENR6 | 0.5 |
| HM168 | ENR4 | 0.5 | ENR7 | 0.5 |
| HM169 | ENR4 | 0.5 | ENR8 | 0.5 |
| HM170 | ENR4 | 0.5 | ENR9 | 0.5 |
| HM171 | ENR5 | 0.5 | ENR6 | 0.5 |
| HM172 | ENR5 | 0.5 | ENR7 | 0.5 |
| HM173 | ENR5 | 0.5 | ENR8 | 0.5 |
| HM174 | ENR5 | 0.5 | ENR9 | 0.5 |
| HM175 | ENR6 | 0.5 | ENR7 | 0.5 |
| HM176 | ENR6 | 0.5 | ENR8 | 0.5 |
| HM177 | ENR6 | 0.5 | ENR9 | 0.5 |
| HM178 | ENR7 | 0.5 | ENR8 | 0.5 |
| HM179 | ENR7 | 0.5 | ENR9 | 0.5 |
| HM180 | ENR8 | 0.5 | ENR9 | 0.5 |
| HM181 | LEV  | 0.5 | LEV1 | 0.5 |
| HM182 | LEV  | 0.5 | LEV2 | 0.5 |

---

---

|       |      |     |      |     |
|-------|------|-----|------|-----|
| HM183 | LEV  | 0.5 | LEV3 | 0.5 |
| HM184 | LEV  | 0.5 | LEV4 | 0.5 |
| HM185 | LEV  | 0.5 | LEV5 | 0.5 |
| HM186 | LEV  | 0.5 | LEV6 | 0.5 |
| HM187 | LEV  | 0.5 | LEV7 | 0.5 |
| HM188 | LEV  | 0.5 | LEV8 | 0.5 |
| HM189 | LEV  | 0.5 | LEV9 | 0.5 |
| HM190 | LEV1 | 0.5 | LEV2 | 0.5 |
| HM191 | LEV1 | 0.5 | LEV3 | 0.5 |
| HM192 | LEV1 | 0.5 | LEV4 | 0.5 |
| HM193 | LEV1 | 0.5 | LEV5 | 0.5 |
| HM194 | LEV1 | 0.5 | LEV6 | 0.5 |
| HM195 | LEV1 | 0.5 | LEV7 | 0.5 |
| HM196 | LEV1 | 0.5 | LEV8 | 0.5 |
| HM197 | LEV1 | 0.5 | LEV9 | 0.5 |
| HM198 | LEV2 | 0.5 | LEV3 | 0.5 |
| HM199 | LEV2 | 0.5 | LEV4 | 0.5 |
| HM200 | LEV2 | 0.5 | LEV5 | 0.5 |
| HM201 | LEV2 | 0.5 | LEV6 | 0.5 |

---

---

|       |      |     |      |     |
|-------|------|-----|------|-----|
| HM202 | LEV2 | 0.5 | LEV7 | 0.5 |
| HM203 | LEV2 | 0.5 | LEV8 | 0.5 |
| HM204 | LEV2 | 0.5 | LEV9 | 0.5 |
| HM205 | LEV3 | 0.5 | LEV4 | 0.5 |
| HM206 | LEV3 | 0.5 | LEV5 | 0.5 |
| HM207 | LEV3 | 0.5 | LEV6 | 0.5 |
| HM208 | LEV3 | 0.5 | LEV7 | 0.5 |
| HM209 | LEV3 | 0.5 | LEV8 | 0.5 |
| HM210 | LEV3 | 0.5 | LEV9 | 0.5 |
| HM211 | LEV4 | 0.5 | LEV5 | 0.5 |
| HM212 | LEV4 | 0.5 | LEV6 | 0.5 |
| HM213 | LEV4 | 0.5 | LEV7 | 0.5 |
| HM214 | LEV4 | 0.5 | LEV8 | 0.5 |
| HM215 | LEV4 | 0.5 | LEV9 | 0.5 |
| HM216 | LEV5 | 0.5 | LEV6 | 0.5 |
| HM217 | LEV5 | 0.5 | LEV7 | 0.5 |
| HM218 | LEV5 | 0.5 | LEV8 | 0.5 |
| HM219 | LEV5 | 0.5 | LEV9 | 0.5 |
| HM220 | LEV6 | 0.5 | LEV7 | 0.5 |

---

---

|       |      |     |      |     |
|-------|------|-----|------|-----|
| HM221 | LEV6 | 0.5 | LEV8 | 0.5 |
| HM222 | LEV6 | 0.5 | LEV9 | 0.5 |
| HM223 | LEV7 | 0.5 | LEV8 | 0.5 |
| HM224 | LEV7 | 0.5 | LEV9 | 0.5 |
| HM225 | LEV8 | 0.5 | LEV9 | 0.5 |
| HM226 | MAR  | 0.5 | MAR1 | 0.5 |
| HM227 | MAR  | 0.5 | MAR2 | 0.5 |
| HM228 | MAR  | 0.5 | MAR3 | 0.5 |
| HM229 | MAR  | 0.5 | MAR4 | 0.5 |
| HM230 | MAR  | 0.5 | MAR5 | 0.5 |
| HM231 | MAR  | 0.5 | MAR6 | 0.5 |
| HM232 | MAR  | 0.5 | MAR7 | 0.5 |
| HM233 | MAR  | 0.5 | MAR8 | 0.5 |
| HM234 | MAR  | 0.5 | MAR9 | 0.5 |
| HM235 | MAR1 | 0.5 | MAR2 | 0.5 |
| HM236 | MAR1 | 0.5 | MAR3 | 0.5 |
| HM237 | MAR1 | 0.5 | MAR4 | 0.5 |
| HM238 | MAR1 | 0.5 | MAR5 | 0.5 |
| HM239 | MAR1 | 0.5 | MAR6 | 0.5 |

---

---

|       |      |     |      |     |
|-------|------|-----|------|-----|
| HM240 | MAR1 | 0.5 | MAR7 | 0.5 |
| HM241 | MAR1 | 0.5 | MAR8 | 0.5 |
| HM242 | MAR1 | 0.5 | MAR9 | 0.5 |
| HM243 | MAR2 | 0.5 | MAR3 | 0.5 |
| HM244 | MAR2 | 0.5 | MAR4 | 0.5 |
| HM245 | MAR2 | 0.5 | MAR5 | 0.5 |
| HM246 | MAR2 | 0.5 | MAR6 | 0.5 |
| HM247 | MAR2 | 0.5 | MAR7 | 0.5 |
| HM248 | MAR2 | 0.5 | MAR8 | 0.5 |
| HM249 | MAR2 | 0.5 | MAR9 | 0.5 |
| HM250 | MAR3 | 0.5 | MAR4 | 0.5 |
| HM251 | MAR3 | 0.5 | MAR5 | 0.5 |
| HM252 | MAR3 | 0.5 | MAR6 | 0.5 |
| HM253 | MAR3 | 0.5 | MAR7 | 0.5 |
| HM254 | MAR3 | 0.5 | MAR8 | 0.5 |
| HM255 | MAR3 | 0.5 | MAR9 | 0.5 |
| HM256 | MAR4 | 0.5 | MAR5 | 0.5 |
| HM257 | MAR4 | 0.5 | MAR6 | 0.5 |
| HM258 | MAR4 | 0.5 | MAR7 | 0.5 |

---



---

|       |      |     |      |     |
|-------|------|-----|------|-----|
| HM259 | MAR4 | 0.5 | MAR8 | 0.5 |
| HM260 | MAR4 | 0.5 | MAR9 | 0.5 |
| HM261 | MAR5 | 0.5 | MAR6 | 0.5 |
| HM262 | MAR5 | 0.5 | MAR7 | 0.5 |
| HM263 | MAR5 | 0.5 | MAR8 | 0.5 |
| HM264 | MAR5 | 0.5 | MAR9 | 0.5 |
| HM265 | MAR6 | 0.5 | MAR7 | 0.5 |
| HM266 | MAR6 | 0.5 | MAR8 | 0.5 |
| HM267 | MAR6 | 0.5 | MAR9 | 0.5 |
| HM268 | MAR7 | 0.5 | MAR8 | 0.5 |
| HM269 | MAR7 | 0.5 | MAR9 | 0.5 |
| HM270 | MAR8 | 0.5 | MAR9 | 0.5 |
| HM271 | NOR  | 0.5 | NOR1 | 0.5 |
| HM272 | NOR  | 0.5 | NOR2 | 0.5 |
| HM273 | NOR  | 0.5 | NOR3 | 0.5 |
| HM274 | NOR  | 0.5 | NOR4 | 0.5 |
| HM275 | NOR  | 0.5 | NOR5 | 0.5 |
| HM276 | NOR  | 0.5 | NOR6 | 0.5 |
| HM277 | NOR  | 0.5 | NOR7 | 0.5 |

---

---

|       |      |     |      |     |
|-------|------|-----|------|-----|
| HM278 | NOR  | 0.5 | NOR8 | 0.5 |
| HM279 | NOR  | 0.5 | NOR9 | 0.5 |
| HM280 | NOR1 | 0.5 | NOR2 | 0.5 |
| HM281 | NOR1 | 0.5 | NOR3 | 0.5 |
| HM282 | NOR1 | 0.5 | NOR4 | 0.5 |
| HM283 | NOR1 | 0.5 | NOR5 | 0.5 |
| HM284 | NOR1 | 0.5 | NOR6 | 0.5 |
| HM285 | NOR1 | 0.5 | NOR7 | 0.5 |
| HM286 | NOR1 | 0.5 | NOR8 | 0.5 |
| HM287 | NOR1 | 0.5 | NOR9 | 0.5 |
| HM288 | NOR2 | 0.5 | NOR3 | 0.5 |
| HM289 | NOR2 | 0.5 | NOR4 | 0.5 |
| HM290 | NOR2 | 0.5 | NOR5 | 0.5 |
| HM291 | NOR2 | 0.5 | NOR6 | 0.5 |
| HM292 | NOR2 | 0.5 | NOR7 | 0.5 |
| HM293 | NOR2 | 0.5 | NOR8 | 0.5 |
| HM294 | NOR2 | 0.5 | NOR9 | 0.5 |
| HM295 | NOR3 | 0.5 | NOR4 | 0.5 |
| HM296 | NOR3 | 0.5 | NOR5 | 0.5 |

---

---

|       |      |     |      |     |
|-------|------|-----|------|-----|
| HM297 | NOR3 | 0.5 | NOR6 | 0.5 |
| HM298 | NOR3 | 0.5 | NOR7 | 0.5 |
| HM299 | NOR3 | 0.5 | NOR8 | 0.5 |
| HM300 | NOR3 | 0.5 | NOR9 | 0.5 |
| HM301 | NOR4 | 0.5 | NOR5 | 0.5 |
| HM302 | NOR4 | 0.5 | NOR6 | 0.5 |
| HM303 | NOR4 | 0.5 | NOR7 | 0.5 |
| HM304 | NOR4 | 0.5 | NOR8 | 0.5 |
| HM305 | NOR4 | 0.5 | NOR9 | 0.5 |
| HM306 | NOR5 | 0.5 | NOR6 | 0.5 |
| HM307 | NOR5 | 0.5 | NOR7 | 0.5 |
| HM308 | NOR5 | 0.5 | NOR8 | 0.5 |
| HM309 | NOR5 | 0.5 | NOR9 | 0.5 |
| HM310 | NOR6 | 0.5 | NOR7 | 0.5 |
| HM311 | NOR6 | 0.5 | NOR8 | 0.5 |
| HM312 | NOR6 | 0.5 | NOR9 | 0.5 |
| HM313 | NOR7 | 0.5 | NOR8 | 0.5 |
| HM314 | NOR7 | 0.5 | NOR9 | 0.5 |
| HM315 | NOR8 | 0.5 | NOR9 | 0.5 |

---

---

|       |      |     |      |     |
|-------|------|-----|------|-----|
| HM316 | PEF  | 0.5 | PEF1 | 0.5 |
| HM317 | PEF  | 0.5 | PEF2 | 0.5 |
| HM318 | PEF  | 0.5 | PEF3 | 0.5 |
| HM319 | PEF  | 0.5 | PEF4 | 0.5 |
| HM320 | PEF  | 0.5 | PEF5 | 0.5 |
| HM321 | PEF  | 0.5 | PEF6 | 0.5 |
| HM322 | PEF  | 0.5 | PEF7 | 0.5 |
| HM323 | PEF  | 0.5 | PEF8 | 0.5 |
| HM324 | PEF  | 0.5 | PEF9 | 0.5 |
| HM325 | PEF1 | 0.5 | PEF2 | 0.5 |
| HM326 | PEF1 | 0.5 | PEF3 | 0.5 |
| HM327 | PEF1 | 0.5 | PEF4 | 0.5 |
| HM328 | PEF1 | 0.5 | PEF5 | 0.5 |
| HM329 | PEF1 | 0.5 | PEF6 | 0.5 |
| HM330 | PEF1 | 0.5 | PEF7 | 0.5 |
| HM331 | PEF1 | 0.5 | PEF8 | 0.5 |
| HM332 | PEF1 | 0.5 | PEF9 | 0.5 |
| HM333 | PEF2 | 0.5 | PEF3 | 0.5 |
| HM334 | PEF2 | 0.5 | PEF4 | 0.5 |

---

---

|       |      |     |      |     |
|-------|------|-----|------|-----|
| HM335 | PEF2 | 0.5 | PEF5 | 0.5 |
| HM336 | PEF2 | 0.5 | PEF6 | 0.5 |
| HM337 | PEF2 | 0.5 | PEF7 | 0.5 |
| HM338 | PEF2 | 0.5 | PEF8 | 0.5 |
| HM339 | PEF2 | 0.5 | PEF9 | 0.5 |
| HM340 | PEF3 | 0.5 | PEF4 | 0.5 |
| HM341 | PEF3 | 0.5 | PEF5 | 0.5 |
| HM342 | PEF3 | 0.5 | PEF6 | 0.5 |
| HM343 | PEF3 | 0.5 | PEF7 | 0.5 |
| HM344 | PEF3 | 0.5 | PEF8 | 0.5 |
| HM345 | PEF3 | 0.5 | PEF9 | 0.5 |
| HM346 | PEF4 | 0.5 | PEF5 | 0.5 |
| HM347 | PEF4 | 0.5 | PEF6 | 0.5 |
| HM348 | PEF4 | 0.5 | PEF7 | 0.5 |
| HM349 | PEF4 | 0.5 | PEF8 | 0.5 |
| HM350 | PEF4 | 0.5 | PEF9 | 0.5 |
| HM351 | PEF5 | 0.5 | PEF6 | 0.5 |
| HM352 | PEF5 | 0.5 | PEF7 | 0.5 |
| HM353 | PEF5 | 0.5 | PEF8 | 0.5 |

---

---

|       |      |     |      |     |
|-------|------|-----|------|-----|
| HM354 | PEF5 | 0.5 | PEF9 | 0.5 |
| HM355 | PEF6 | 0.5 | PEF7 | 0.5 |
| HM356 | PEF6 | 0.5 | PEF8 | 0.5 |
| HM357 | PEF6 | 0.5 | PEF9 | 0.5 |
| HM358 | PEF7 | 0.5 | PEF8 | 0.5 |
| HM359 | PEF7 | 0.5 | PEF9 | 0.5 |
| HM360 | PEF8 | 0.5 | PEF9 | 0.5 |
| HM361 | SAR  | 0.5 | SAR1 | 0.5 |
| HM362 | SAR  | 0.5 | SAR2 | 0.5 |
| HM363 | SAR  | 0.5 | SAR3 | 0.5 |
| HM364 | SAR  | 0.5 | SAR4 | 0.5 |
| HM365 | SAR  | 0.5 | SAR5 | 0.5 |
| HM366 | SAR  | 0.5 | SAR6 | 0.5 |
| HM367 | SAR  | 0.5 | SAR7 | 0.5 |
| HM368 | SAR  | 0.5 | SAR8 | 0.5 |
| HM369 | SAR  | 0.5 | SAR9 | 0.5 |
| HM370 | SAR1 | 0.5 | SAR2 | 0.5 |
| HM371 | SAR1 | 0.5 | SAR3 | 0.5 |
| HM372 | SAR1 | 0.5 | SAR4 | 0.5 |

---

---

|       |      |     |      |     |
|-------|------|-----|------|-----|
| HM373 | SAR1 | 0.5 | SAR5 | 0.5 |
| HM374 | SAR1 | 0.5 | SAR6 | 0.5 |
| HM375 | SAR1 | 0.5 | SAR7 | 0.5 |
| HM376 | SAR1 | 0.5 | SAR8 | 0.5 |
| HM377 | SAR1 | 0.5 | SAR9 | 0.5 |
| HM378 | SAR2 | 0.5 | SAR3 | 0.5 |
| HM379 | SAR2 | 0.5 | SAR4 | 0.5 |
| HM380 | SAR2 | 0.5 | SAR5 | 0.5 |
| HM381 | SAR2 | 0.5 | SAR6 | 0.5 |
| HM382 | SAR2 | 0.5 | SAR7 | 0.5 |
| HM383 | SAR2 | 0.5 | SAR8 | 0.5 |
| HM384 | SAR2 | 0.5 | SAR9 | 0.5 |
| HM385 | SAR3 | 0.5 | SAR4 | 0.5 |
| HM386 | SAR3 | 0.5 | SAR5 | 0.5 |
| HM387 | SAR3 | 0.5 | SAR6 | 0.5 |
| HM388 | SAR3 | 0.5 | SAR7 | 0.5 |
| HM389 | SAR3 | 0.5 | SAR8 | 0.5 |
| HM390 | SAR3 | 0.5 | SAR9 | 0.5 |
| HM391 | SAR4 | 0.5 | SAR5 | 0.5 |

---

|       |      |     |      |     |
|-------|------|-----|------|-----|
| HM392 | SAR4 | 0.5 | SAR6 | 0.5 |
| HM393 | SAR4 | 0.5 | SAR7 | 0.5 |
| HM394 | SAR4 | 0.5 | SAR8 | 0.5 |
| HM395 | SAR4 | 0.5 | SAR9 | 0.5 |
| HM396 | SAR5 | 0.5 | SAR6 | 0.5 |
| HM397 | SAR5 | 0.5 | SAR7 | 0.5 |
| HM398 | SAR5 | 0.5 | SAR8 | 0.5 |
| HM399 | SAR5 | 0.5 | SAR9 | 0.5 |
| HM400 | SAR6 | 0.5 | SAR7 | 0.5 |
| HM401 | SAR6 | 0.5 | SAR8 | 0.5 |
| HM402 | SAR6 | 0.5 | SAR9 | 0.5 |
| HM403 | SAR7 | 0.5 | SAR8 | 0.5 |
| HM404 | SAR7 | 0.5 | SAR9 | 0.5 |
| HM405 | SAR8 | 0.5 | SAR9 | 0.5 |

\*N.B. HM = hypothetical mixtures, CIP = ciprofloxacin, DAN = danofloxacin, ENO = enoxacin, ENR = enrofloxacin, LEV = levofloxacin, MAR = marbofloxacin, NOR = norfloxacin, PEF = pefloxacin, and SAR = sarafloxacin

**Table S5.** Computed X-variances,  $R^2$ , and  $Q^2_{LOO}$  values after incorporating each LVs

| Number of LVs | X-Variance | $R^2$ | $Q^2_{LOO}$ | Inference |
|---------------|------------|-------|-------------|-----------|
| 1             | 0.316      | 0.599 | 0.544       | -         |



|          |              |              |              |                                                                                  |
|----------|--------------|--------------|--------------|----------------------------------------------------------------------------------|
| 2        | 0.623        | 0.671        | 0.612        | -                                                                                |
| 3        | 0.732        | 0.766        | 0.657        | -                                                                                |
| 4        | 0.833        | 0.864        | 0.801        | -                                                                                |
| <b>5</b> | <b>0.948</b> | <b>0.882</b> | <b>0.849</b> | Mximum possible X-variance accounted. Thus, the optimum number of <b>LVs = 5</b> |
| 6        | 1.000        | 0.885        | 0.858        | In PLS, the number of LVs < number of descriptors                                |

**Table S6.** Optimized hyperparameters of the ML algorithm used in this study

| <b>ML algorithm</b> | <b>Optimized setting</b>                                                                                                                                                                                                             |
|---------------------|--------------------------------------------------------------------------------------------------------------------------------------------------------------------------------------------------------------------------------------|
| <b>RF</b>           | <i>Max-depth = 2, max_leaf_nodes = none, min_impurity_decrease = 0.0, min_sample_split = 2, min_sample_leaf = 3, n_estimator = 200, min_weight_fraction_leaf = 0.0</i>                                                               |
| <b>AdaBoost</b>     | <i>n-Estimator = 70, loss = square</i>                                                                                                                                                                                               |
| <b>GB</b>           | <i>Max-depth = 4, min_sample_split = 2, min_sample_leaf = 1, n_estimator = 50, criterion = friedman_msc, min_weight_fraction_leaf = 0.0, min_impurity_decrease = 0.0, subsample = 1.0, learning_rate = 0.1, loss = squared_error</i> |
| <b>XGB</b>          | <i>n_estimator = 200, max_depth = none, booster = gblinear, learning_rate = 1.0</i>                                                                                                                                                  |
| <b>SVM</b>          | <i>C = 5, degree = 2, gamma = auto</i>                                                                                                                                                                                               |
| <b>LSVM</b>         | <i>C = 1</i>                                                                                                                                                                                                                         |
| <b>RR</b>           | <i>Alpha (<math>\alpha</math>) = 0.5</i>                                                                                                                                                                                             |

**Table S7.** Toxicity prediction of hypothetical binary mixtures along with their reliability of prediction and AD status

| Hypothetical Mixtures | Predicted response | PredictionQuality | AD status | Toxic class  |
|-----------------------|--------------------|-------------------|-----------|--------------|
| 1                     | 7.277              | Good              | In        | Less toxic   |
| 2                     | 7.342              | Good              | In        | Highly toxic |
| 3                     | 7.313              | Good              | In        | Highly toxic |
| 4                     | 7.280              | Good              | In        | Less toxic   |
| 5                     | 7.288              | Good              | In        | Less toxic   |
| 6                     | 7.219              | Good              | In        | Less toxic   |
| 7                     | 7.500              | Moderate          | In        | Highly toxic |
| 8                     | 7.250              | Good              | In        | Less toxic   |
| 9                     | 7.443              | Moderate          | In        | Highly toxic |
| 10                    | 7.308              | Good              | In        | Highly toxic |
| 11                    | 7.278              | Good              | In        | Less toxic   |
| 12                    | 7.246              | Good              | In        | Less toxic   |
| 13                    | 7.254              | Good              | In        | Less toxic   |
| 14                    | 7.185              | Good              | In        | Less toxic   |
| 15                    | 7.466              | Moderate          | In        | Highly toxic |
| 16                    | 7.216              | Good              | In        | Less toxic   |
| 17                    | 7.409              | Moderate          | In        | Highly toxic |

---

|    |       |          |    |              |
|----|-------|----------|----|--------------|
| 18 | 7.343 | Good     | In | Highly toxic |
| 19 | 7.310 | Good     | In | Highly toxic |
| 20 | 7.319 | Good     | In | Highly toxic |
| 21 | 7.249 | Good     | In | Less toxic   |
| 22 | 7.530 | Moderate | In | Highly toxic |
| 23 | 7.280 | Good     | In | Less toxic   |
| 24 | 7.474 | Moderate | In | Highly toxic |
| 25 | 7.281 | Good     | In | Less toxic   |
| 26 | 7.289 | Good     | In | Less toxic   |
| 27 | 7.220 | Good     | In | Less toxic   |
| 28 | 7.501 | Moderate | In | Highly toxic |
| 29 | 7.251 | Good     | In | Less toxic   |
| 30 | 7.444 | Moderate | In | Highly toxic |
| 31 | 7.257 | Good     | In | Less toxic   |
| 32 | 7.188 | Good     | In | Less toxic   |
| 33 | 7.469 | Moderate | In | Highly toxic |
| 34 | 7.219 | Good     | In | Less toxic   |
| 35 | 7.412 | Moderate | In | Highly toxic |
| 36 | 7.196 | Good     | In | Less toxic   |
| 37 | 7.477 | Moderate | In | Highly toxic |
| 38 | 7.227 | Good     | In | Less toxic   |
| 39 | 7.420 | Moderate | In | Highly toxic |

---

---

|    |       |          |    |              |
|----|-------|----------|----|--------------|
| 40 | 7.408 | Moderate | In | Highly toxic |
| 41 | 7.158 | Good     | In | Less toxic   |
| 42 | 7.351 | Good     | In | Highly toxic |
| 43 | 7.439 | Moderate | In | Highly toxic |
| 44 | 7.632 | Moderate | In | Highly toxic |
| 45 | 7.382 | Good     | In | Highly toxic |
| 46 | 7.012 | Good     | In | Less toxic   |
| 47 | 7.051 | Good     | In | Less toxic   |
| 48 | 7.008 | Good     | In | Less toxic   |
| 49 | 7.302 | Good     | In | Highly toxic |
| 50 | 7.289 | Good     | In | Less toxic   |
| 51 | 7.281 | Good     | In | Less toxic   |
| 52 | 7.525 | Moderate | In | Highly toxic |
| 53 | 7.264 | Good     | In | Less toxic   |
| 54 | 7.482 | Moderate | In | Highly toxic |
| 55 | 7.042 | Good     | In | Less toxic   |
| 56 | 7.000 | Good     | In | Less toxic   |
| 57 | 7.293 | Good     | In | Less toxic   |
| 58 | 7.280 | Good     | In | Less toxic   |
| 59 | 7.273 | Good     | In | Less toxic   |
| 60 | 7.516 | Moderate | In | Highly toxic |
| 61 | 7.255 | Good     | In | Less toxic   |

---

---

|    |       |                |    |              |
|----|-------|----------------|----|--------------|
| 62 | 7.474 | Moderate       | In | Highly toxic |
| 63 | 7.038 | Good           | In | Less toxic   |
| 64 | 7.332 | Good           | In | Highly toxic |
| 65 | 7.318 | Good           | In | Highly toxic |
| 66 | 7.311 | Good           | In | Highly toxic |
| 67 | 7.555 | Moderate       | In | Highly toxic |
| 68 | 7.294 | Good           | In | Less toxic   |
| 69 | 7.512 | Moderate       | In | Highly toxic |
| 70 | 7.289 | Good           | In | Less toxic   |
| 71 | 7.276 | Good           | In | Less toxic   |
| 72 | 7.268 | Good           | In | Less toxic   |
| 73 | 7.512 | Moderate       | In | Highly toxic |
| 74 | 7.251 | Good           | In | Less toxic   |
| 75 | 7.469 | Moderate       | In | Highly toxic |
| 76 | 7.570 | Moderate       | In | Highly toxic |
| 77 | 7.562 | Moderate       | In | Highly toxic |
| 78 | 7.806 | Bad/Unreliable | In | Highly toxic |
| 79 | 7.545 | Moderate       | In | Highly toxic |
| 80 | 7.763 | Bad/Unreliable | In | Highly toxic |
| 81 | 7.549 | Moderate       | In | Highly toxic |
| 82 | 7.792 | Bad/Unreliable | In | Highly toxic |
| 83 | 7.531 | Moderate       | In | Highly toxic |

---

---

|     |       |                |    |              |
|-----|-------|----------------|----|--------------|
| 84  | 7.750 | Bad/Unreliable | In | Highly toxic |
| 85  | 7.785 | Bad/Unreliable | In | Highly toxic |
| 86  | 7.524 | Moderate       | In | Highly toxic |
| 87  | 7.742 | Bad/Unreliable | In | Highly toxic |
| 88  | 7.768 | Bad/Unreliable | In | Highly toxic |
| 89  | 7.986 | Bad/Unreliable | In | Highly toxic |
| 90  | 7.725 | Bad/Unreliable | In | Highly toxic |
| 91  | 6.319 | Good           | In | Less toxic   |
| 92  | 6.409 | Good           | In | Less toxic   |
| 93  | 6.319 | Good           | In | Less toxic   |
| 94  | 6.348 | Good           | In | Less toxic   |
| 95  | 6.316 | Good           | In | Less toxic   |
| 96  | 6.309 | Good           | In | Less toxic   |
| 97  | 6.600 | Good           | In | Less toxic   |
| 98  | 6.300 | Good           | In | Less toxic   |
| 99  | 6.754 | Good           | In | Less toxic   |
| 100 | 6.397 | Good           | In | Less toxic   |
| 101 | 6.307 | Good           | In | Less toxic   |
| 102 | 6.336 | Good           | In | Less toxic   |
| 103 | 6.304 | Good           | In | Less toxic   |
| 104 | 6.296 | Good           | In | Less toxic   |
| 105 | 6.588 | Good           | In | Less toxic   |

---

---

|     |       |      |    |            |
|-----|-------|------|----|------------|
| 106 | 6.287 | Good | In | Less toxic |
| 107 | 6.742 | Good | In | Less toxic |
| 108 | 6.397 | Good | In | Less toxic |
| 109 | 6.426 | Good | In | Less toxic |
| 110 | 6.394 | Good | In | Less toxic |
| 111 | 6.387 | Good | In | Less toxic |
| 112 | 6.678 | Good | In | Less toxic |
| 113 | 6.378 | Good | In | Less toxic |
| 114 | 6.832 | Good | In | Less toxic |
| 115 | 6.337 | Good | In | Less toxic |
| 116 | 6.304 | Good | In | Less toxic |
| 117 | 6.297 | Good | In | Less toxic |
| 118 | 6.588 | Good | In | Less toxic |
| 119 | 6.288 | Good | In | Less toxic |
| 120 | 6.742 | Good | In | Less toxic |
| 121 | 6.333 | Good | In | Less toxic |
| 122 | 6.326 | Good | In | Less toxic |
| 123 | 6.617 | Good | In | Less toxic |
| 124 | 6.317 | Good | In | Less toxic |
| 125 | 6.771 | Good | In | Less toxic |
| 126 | 6.294 | Good | In | Less toxic |
| 127 | 6.585 | Good | In | Less toxic |

---

---

|     |       |      |    |              |
|-----|-------|------|----|--------------|
| 128 | 6.285 | Good | In | Less toxic   |
| 129 | 6.739 | Good | In | Less toxic   |
| 130 | 6.578 | Good | In | Less toxic   |
| 131 | 6.277 | Good | In | Less toxic   |
| 132 | 6.732 | Good | In | Less toxic   |
| 133 | 6.569 | Good | In | Less toxic   |
| 134 | 7.023 | Good | In | Less toxic   |
| 135 | 6.723 | Good | In | Less toxic   |
| 136 | 7.115 | Good | In | Less toxic   |
| 137 | 7.211 | Good | In | Less toxic   |
| 138 | 7.111 | Good | In | Less toxic   |
| 139 | 7.066 | Good | In | Less toxic   |
| 140 | 7.117 | Good | In | Less toxic   |
| 141 | 7.032 | Good | In | Less toxic   |
| 142 | 7.370 | Good | In | Highly toxic |
| 143 | 7.104 | Good | In | Less toxic   |
| 144 | 7.340 | Good | In | Highly toxic |
| 145 | 7.203 | Good | In | Less toxic   |
| 146 | 7.102 | Good | In | Less toxic   |
| 147 | 7.057 | Good | In | Less toxic   |
| 148 | 7.108 | Good | In | Less toxic   |
| 149 | 7.023 | Good | In | Less toxic   |

---



---

|     |       |          |    |              |
|-----|-------|----------|----|--------------|
| 150 | 7.361 | Good     | In | Highly toxic |
| 151 | 7.096 | Good     | In | Less toxic   |
| 152 | 7.331 | Good     | In | Highly toxic |
| 153 | 7.199 | Good     | In | Less toxic   |
| 154 | 7.153 | Good     | In | Less toxic   |
| 155 | 7.204 | Good     | In | Less toxic   |
| 156 | 7.119 | Good     | In | Less toxic   |
| 157 | 7.457 | Moderate | In | Highly toxic |
| 158 | 7.192 | Good     | In | Less toxic   |
| 159 | 7.427 | Moderate | In | Highly toxic |
| 160 | 7.053 | Good     | In | Less toxic   |
| 161 | 7.104 | Good     | In | Less toxic   |
| 162 | 7.019 | Good     | In | Less toxic   |
| 163 | 7.357 | Good     | In | Highly toxic |
| 164 | 7.092 | Good     | In | Less toxic   |
| 165 | 7.327 | Good     | In | Highly toxic |
| 166 | 7.059 | Good     | In | Less toxic   |
| 167 | 6.974 | Good     | In | Less toxic   |
| 168 | 7.312 | Good     | In | Highly toxic |
| 169 | 7.046 | Good     | In | Less toxic   |
| 170 | 7.282 | Good     | In | Less toxic   |
| 171 | 7.025 | Good     | In | Less toxic   |

---

---

|     |       |          |            |              |
|-----|-------|----------|------------|--------------|
| 172 | 7.363 | Good     | In         | Highly toxic |
| 173 | 7.097 | Good     | In         | Less toxic   |
| 174 | 7.333 | Good     | In         | Highly toxic |
| 175 | 7.278 | Good     | In         | Less toxic   |
| 176 | 7.012 | Good     | In         | Less toxic   |
| 177 | 7.248 | Good     | In         | Less toxic   |
| 178 | 7.350 | Good     | In         | Highly toxic |
| 179 | 7.586 | Moderate | In         | Highly toxic |
| 180 | 7.321 | Good     | In         | Highly toxic |
| 181 | 6.539 | Good     | In         | Less toxic   |
| 182 | 6.541 | Good     | In         | Less toxic   |
| 183 | 6.641 | Good     | In         | Less toxic   |
| 184 | 6.581 | Good     | In         | Less toxic   |
| 185 | 6.613 | Good     | In         | Less toxic   |
| 186 | 6.477 | Good     | In         | Less toxic   |
| 187 | 6.806 | Good     | In         | Less toxic   |
| 188 | 6.516 | Good     | In         | Less toxic   |
| 189 | 6.705 | Good     | In         | Less toxic   |
| 190 | 6.445 | Good     | Outside AD | Less toxic   |
| 191 | 6.544 | Good     | In         | Less toxic   |
| 192 | 6.484 | Good     | In         | Less toxic   |
| 193 | 6.517 | Good     | In         | Less toxic   |

---

---

|     |       |      |            |            |
|-----|-------|------|------------|------------|
| 194 | 6.380 | Good | In         | Less toxic |
| 195 | 6.710 | Good | In         | Less toxic |
| 196 | 6.420 | Good | In         | Less toxic |
| 197 | 6.608 | Good | In         | Less toxic |
| 198 | 6.547 | Good | Outside AD | Less toxic |
| 199 | 6.487 | Good | In         | Less toxic |
| 200 | 6.519 | Good | In         | Less toxic |
| 201 | 6.383 | Good | In         | Less toxic |
| 202 | 6.712 | Good | Outside AD | Less toxic |
| 203 | 6.422 | Good | In         | Less toxic |
| 204 | 6.610 | Good | Outside AD | Less toxic |
| 205 | 6.586 | Good | In         | Less toxic |
| 206 | 6.619 | Good | In         | Less toxic |
| 207 | 6.482 | Good | In         | Less toxic |
| 208 | 6.811 | Good | Outside AD | Less toxic |
| 209 | 6.521 | Good | In         | Less toxic |
| 210 | 6.710 | Good | In         | Less toxic |
| 211 | 6.559 | Good | In         | Less toxic |
| 212 | 6.422 | Good | In         | Less toxic |
| 213 | 6.751 | Good | In         | Less toxic |
| 214 | 6.461 | Good | In         | Less toxic |
| 215 | 6.650 | Good | In         | Less toxic |

---

---

|     |       |          |            |              |
|-----|-------|----------|------------|--------------|
| 216 | 6.455 | Good     | In         | Less toxic   |
| 217 | 6.784 | Good     | In         | Less toxic   |
| 218 | 6.494 | Good     | In         | Less toxic   |
| 219 | 6.682 | Good     | In         | Less toxic   |
| 220 | 6.647 | Good     | In         | Less toxic   |
| 221 | 6.357 | Good     | In         | Less toxic   |
| 222 | 6.546 | Good     | In         | Less toxic   |
| 223 | 6.687 | Good     | In         | Less toxic   |
| 224 | 6.875 | Good     | Outside AD | Less toxic   |
| 225 | 6.585 | Good     | In         | Less toxic   |
| 226 | 7.129 | Good     | In         | Less toxic   |
| 227 | 7.153 | Good     | In         | Less toxic   |
| 228 | 7.218 | Good     | In         | Less toxic   |
| 229 | 7.187 | Good     | In         | Less toxic   |
| 230 | 7.197 | Good     | In         | Less toxic   |
| 231 | 7.089 | Good     | In         | Less toxic   |
| 232 | 7.397 | Moderate | In         | Highly toxic |
| 233 | 7.106 | Good     | In         | Less toxic   |
| 234 | 7.302 | Good     | In         | Highly toxic |
| 235 | 7.063 | Good     | In         | Less toxic   |
| 236 | 7.128 | Good     | In         | Less toxic   |
| 237 | 7.097 | Good     | In         | Less toxic   |

---

---

|     |       |          |            |              |
|-----|-------|----------|------------|--------------|
| 238 | 7.107 | Good     | In         | Less toxic   |
| 239 | 6.999 | Good     | In         | Less toxic   |
| 240 | 7.307 | Good     | In         | Highly toxic |
| 241 | 7.016 | Good     | In         | Less toxic   |
| 242 | 7.211 | Good     | In         | Less toxic   |
| 243 | 7.152 | Good     | In         | Less toxic   |
| 244 | 7.121 | Good     | In         | Less toxic   |
| 245 | 7.131 | Good     | In         | Less toxic   |
| 246 | 7.023 | Good     | In         | Less toxic   |
| 247 | 7.331 | Good     | Outside AD | Highly toxic |
| 248 | 7.040 | Good     | In         | Less toxic   |
| 249 | 7.235 | Good     | In         | Less toxic   |
| 250 | 7.186 | Good     | In         | Less toxic   |
| 251 | 7.196 | Good     | In         | Less toxic   |
| 252 | 7.088 | Good     | In         | Less toxic   |
| 253 | 7.396 | Moderate | In         | Highly toxic |
| 254 | 7.105 | Good     | In         | Less toxic   |
| 255 | 7.300 | Good     | In         | Highly toxic |
| 256 | 7.165 | Good     | In         | Less toxic   |
| 257 | 7.057 | Good     | In         | Less toxic   |
| 258 | 7.365 | Good     | In         | Highly toxic |
| 259 | 7.074 | Good     | In         | Less toxic   |

---

---

|     |       |          |            |              |
|-----|-------|----------|------------|--------------|
| 260 | 7.269 | Good     | In         | Less toxic   |
| 261 | 7.068 | Good     | In         | Less toxic   |
| 262 | 7.375 | Good     | Outside AD | Highly toxic |
| 263 | 7.084 | Good     | In         | Less toxic   |
| 264 | 7.280 | Good     | In         | Less toxic   |
| 265 | 7.267 | Good     | In         | Less toxic   |
| 266 | 6.977 | Good     | In         | Less toxic   |
| 267 | 7.172 | Good     | In         | Less toxic   |
| 268 | 7.284 | Good     | In         | Less toxic   |
| 269 | 7.480 | Moderate | Outside AD | Highly toxic |
| 270 | 7.189 | Good     | In         | Less toxic   |
| 271 | 6.240 | Good     | In         | Less toxic   |
| 272 | 6.289 | Good     | In         | Less toxic   |
| 273 | 6.294 | Good     | In         | Less toxic   |
| 274 | 6.194 | Good     | In         | Less toxic   |
| 275 | 6.267 | Good     | In         | Less toxic   |
| 276 | 6.141 | Good     | In         | Less toxic   |
| 277 | 6.466 | Good     | In         | Less toxic   |
| 278 | 6.216 | Good     | In         | Less toxic   |
| 279 | 6.396 | Good     | In         | Less toxic   |
| 280 | 6.242 | Good     | In         | Less toxic   |
| 281 | 6.246 | Good     | In         | Less toxic   |

---

---

|     |       |          |    |            |
|-----|-------|----------|----|------------|
| 282 | 6.146 | Good     | In | Less toxic |
| 283 | 6.220 | Good     | In | Less toxic |
| 284 | 6.094 | Moderate | In | Less toxic |
| 285 | 6.418 | Good     | In | Less toxic |
| 286 | 6.169 | Good     | In | Less toxic |
| 287 | 6.348 | Good     | In | Less toxic |
| 288 | 6.295 | Good     | In | Less toxic |
| 289 | 6.195 | Good     | In | Less toxic |
| 290 | 6.269 | Good     | In | Less toxic |
| 291 | 6.143 | Good     | In | Less toxic |
| 292 | 6.467 | Good     | In | Less toxic |
| 293 | 6.217 | Good     | In | Less toxic |
| 294 | 6.397 | Good     | In | Less toxic |
| 295 | 6.200 | Good     | In | Less toxic |
| 296 | 6.273 | Good     | In | Less toxic |
| 297 | 6.147 | Good     | In | Less toxic |
| 298 | 6.472 | Good     | In | Less toxic |
| 299 | 6.222 | Good     | In | Less toxic |
| 300 | 6.402 | Good     | In | Less toxic |
| 301 | 6.173 | Good     | In | Less toxic |
| 302 | 6.047 | Moderate | In | Less toxic |
| 303 | 6.371 | Good     | In | Less toxic |

---

---

|     |       |          |    |            |
|-----|-------|----------|----|------------|
| 304 | 6.122 | Good     | In | Less toxic |
| 305 | 6.301 | Good     | In | Less toxic |
| 306 | 6.121 | Good     | In | Less toxic |
| 307 | 6.445 | Good     | In | Less toxic |
| 308 | 6.196 | Good     | In | Less toxic |
| 309 | 6.375 | Good     | In | Less toxic |
| 310 | 6.319 | Good     | In | Less toxic |
| 311 | 6.069 | Moderate | In | Less toxic |
| 312 | 6.249 | Good     | In | Less toxic |
| 313 | 6.394 | Good     | In | Less toxic |
| 314 | 6.573 | Good     | In | Less toxic |
| 315 | 6.324 | Good     | In | Less toxic |
| 316 | 6.530 | Good     | In | Less toxic |
| 317 | 6.595 | Good     | In | Less toxic |
| 318 | 6.562 | Good     | In | Less toxic |
| 319 | 6.418 | Good     | In | Less toxic |
| 320 | 6.554 | Good     | In | Less toxic |
| 321 | 6.380 | Good     | In | Less toxic |
| 322 | 6.777 | Good     | In | Less toxic |
| 323 | 6.516 | Good     | In | Less toxic |
| 324 | 6.722 | Good     | In | Less toxic |
| 325 | 6.561 | Good     | In | Less toxic |

---



---

|     |       |      |    |            |
|-----|-------|------|----|------------|
| 326 | 6.528 | Good | In | Less toxic |
| 327 | 6.384 | Good | In | Less toxic |
| 328 | 6.520 | Good | In | Less toxic |
| 329 | 6.346 | Good | In | Less toxic |
| 330 | 6.743 | Good | In | Less toxic |
| 331 | 6.482 | Good | In | Less toxic |
| 332 | 6.688 | Good | In | Less toxic |
| 333 | 6.593 | Good | In | Less toxic |
| 334 | 6.449 | Good | In | Less toxic |
| 335 | 6.585 | Good | In | Less toxic |
| 336 | 6.411 | Good | In | Less toxic |
| 337 | 6.809 | Good | In | Less toxic |
| 338 | 6.547 | Good | In | Less toxic |
| 339 | 6.753 | Good | In | Less toxic |
| 340 | 6.416 | Good | In | Less toxic |
| 341 | 6.552 | Good | In | Less toxic |
| 342 | 6.378 | Good | In | Less toxic |
| 343 | 6.775 | Good | In | Less toxic |
| 344 | 6.514 | Good | In | Less toxic |
| 345 | 6.720 | Good | In | Less toxic |
| 346 | 6.407 | Good | In | Less toxic |
| 347 | 6.234 | Good | In | Less toxic |

---

---

|     |       |          |            |              |
|-----|-------|----------|------------|--------------|
| 348 | 6.631 | Good     | In         | Less toxic   |
| 349 | 6.370 | Good     | In         | Less toxic   |
| 350 | 6.576 | Good     | In         | Less toxic   |
| 351 | 6.369 | Good     | In         | Less toxic   |
| 352 | 6.767 | Good     | In         | Less toxic   |
| 353 | 6.505 | Good     | In         | Less toxic   |
| 354 | 6.711 | Good     | In         | Less toxic   |
| 355 | 6.593 | Good     | In         | Less toxic   |
| 356 | 6.332 | Good     | In         | Less toxic   |
| 357 | 6.538 | Good     | In         | Less toxic   |
| 358 | 6.729 | Good     | In         | Less toxic   |
| 359 | 6.935 | Good     | In         | Less toxic   |
| 360 | 6.674 | Good     | In         | Less toxic   |
| 361 | 7.113 | Good     | Outside AD | Less toxic   |
| 362 | 7.268 | Good     | Outside AD | Less toxic   |
| 363 | 7.048 | Good     | Outside AD | Less toxic   |
| 364 | 7.075 | Good     | Outside AD | Less toxic   |
| 365 | 7.134 | Good     | Outside AD | Less toxic   |
| 366 | 7.017 | Good     | Outside AD | Less toxic   |
| 367 | 7.390 | Moderate | Outside AD | Highly toxic |
| 368 | 7.071 | Good     | Outside AD | Less toxic   |
| 369 | 7.320 | Good     | Outside AD | Highly toxic |

---

---

|     |       |          |            |              |
|-----|-------|----------|------------|--------------|
| 370 | 7.208 | Good     | Outside AD | Less toxic   |
| 371 | 6.987 | Good     | Outside AD | Less toxic   |
| 372 | 7.014 | Good     | Outside AD | Less toxic   |
| 373 | 7.073 | Good     | Outside AD | Less toxic   |
| 374 | 6.956 | Good     | Outside AD | Less toxic   |
| 375 | 7.329 | Good     | Outside AD | Highly toxic |
| 376 | 7.011 | Good     | Outside AD | Less toxic   |
| 377 | 7.259 | Good     | Outside AD | Less toxic   |
| 378 | 7.142 | Good     | Outside AD | Less toxic   |
| 379 | 7.170 | Good     | Outside AD | Less toxic   |
| 380 | 7.229 | Good     | Outside AD | Less toxic   |
| 381 | 7.112 | Good     | Outside AD | Less toxic   |
| 382 | 7.485 | Moderate | Outside AD | Highly toxic |
| 383 | 7.166 | Good     | Outside AD | Less toxic   |
| 384 | 7.414 | Moderate | Outside AD | Highly toxic |
| 385 | 6.949 | Good     | Outside AD | Less toxic   |
| 386 | 7.008 | Good     | Outside AD | Less toxic   |
| 387 | 6.891 | Good     | Outside AD | Less toxic   |
| 388 | 7.264 | Good     | Outside AD | Less toxic   |
| 389 | 6.945 | Good     | Outside AD | Less toxic   |
| 390 | 7.193 | Good     | Outside AD | Less toxic   |
| 391 | 7.036 | Good     | Outside AD | Less toxic   |

---

---

|     |       |          |            |              |
|-----|-------|----------|------------|--------------|
| 392 | 6.918 | Good     | Outside AD | Less toxic   |
| 393 | 7.292 | Good     | Outside AD | Less toxic   |
| 394 | 6.973 | Good     | Outside AD | Less toxic   |
| 395 | 7.221 | Good     | Outside AD | Less toxic   |
| 396 | 6.977 | Good     | Outside AD | Less toxic   |
| 397 | 7.350 | Good     | Outside AD | Highly toxic |
| 398 | 7.032 | Good     | Outside AD | Less toxic   |
| 399 | 7.280 | Good     | Outside AD | Less toxic   |
| 400 | 7.233 | Good     | Outside AD | Less toxic   |
| 401 | 6.915 | Good     | Outside AD | Less toxic   |
| 402 | 7.163 | Good     | Outside AD | Less toxic   |
| 403 | 7.288 | Good     | Outside AD | Less toxic   |
| 404 | 7.536 | Moderate | Outside AD | Highly toxic |
| 405 | 7.217 | Good     | Outside AD | Less toxic   |

---

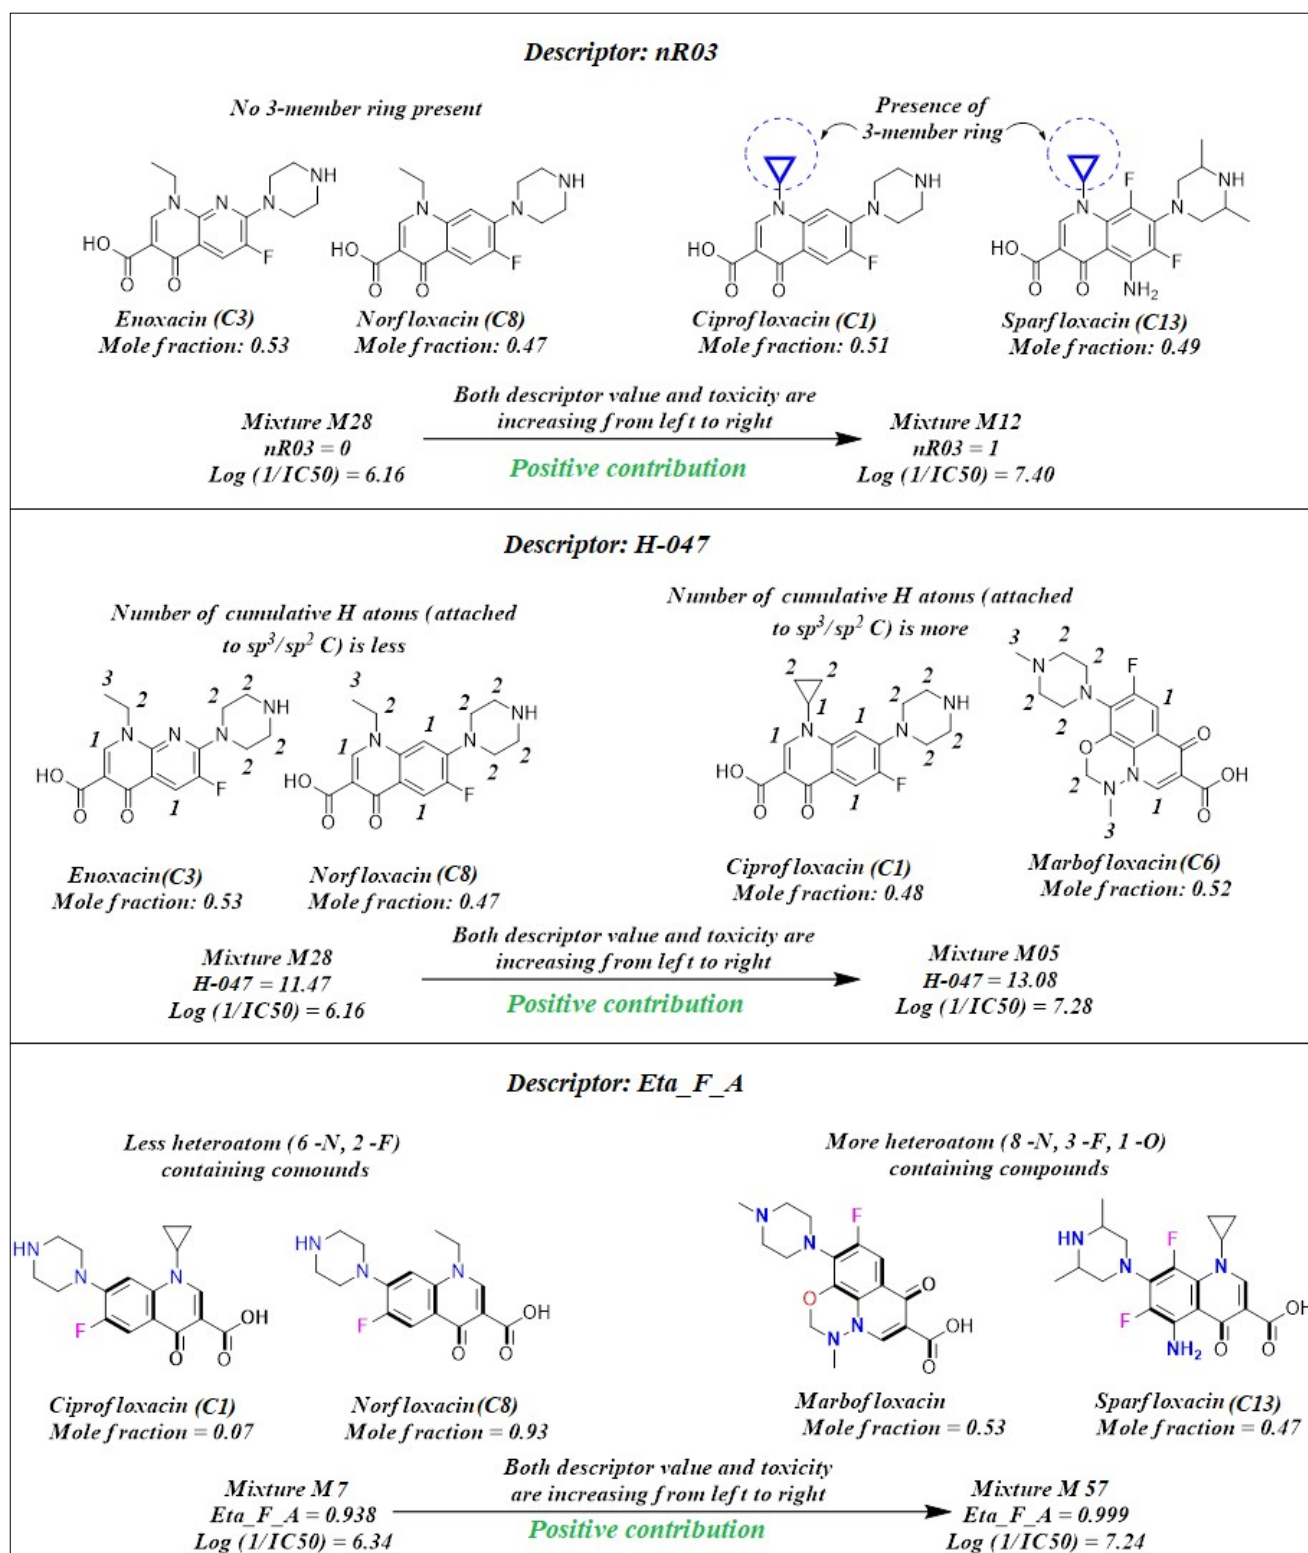

**Figure S1.** Significance of positive contributory descriptors towards toxicity

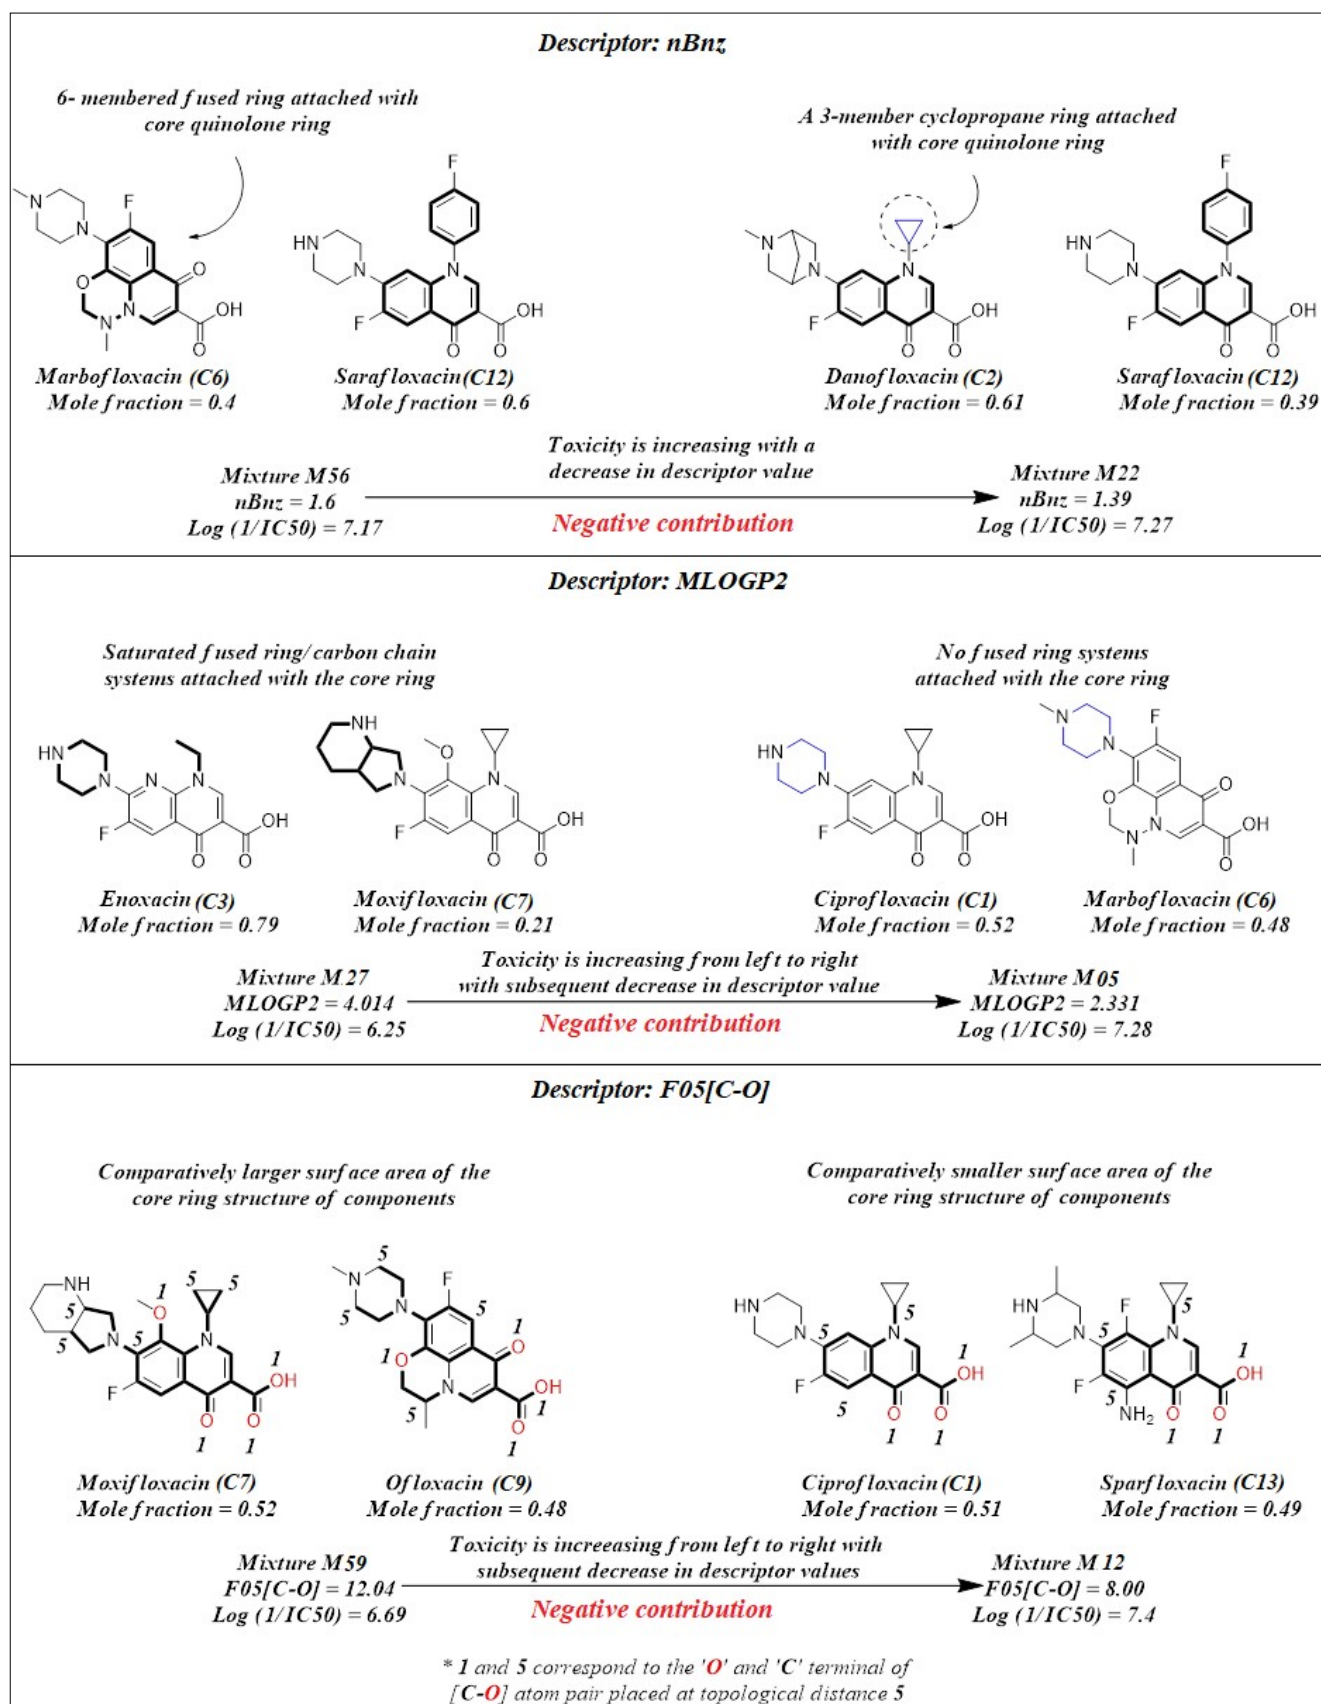

**Figure S2.** Significance of negative contributory descriptors towards toxicity

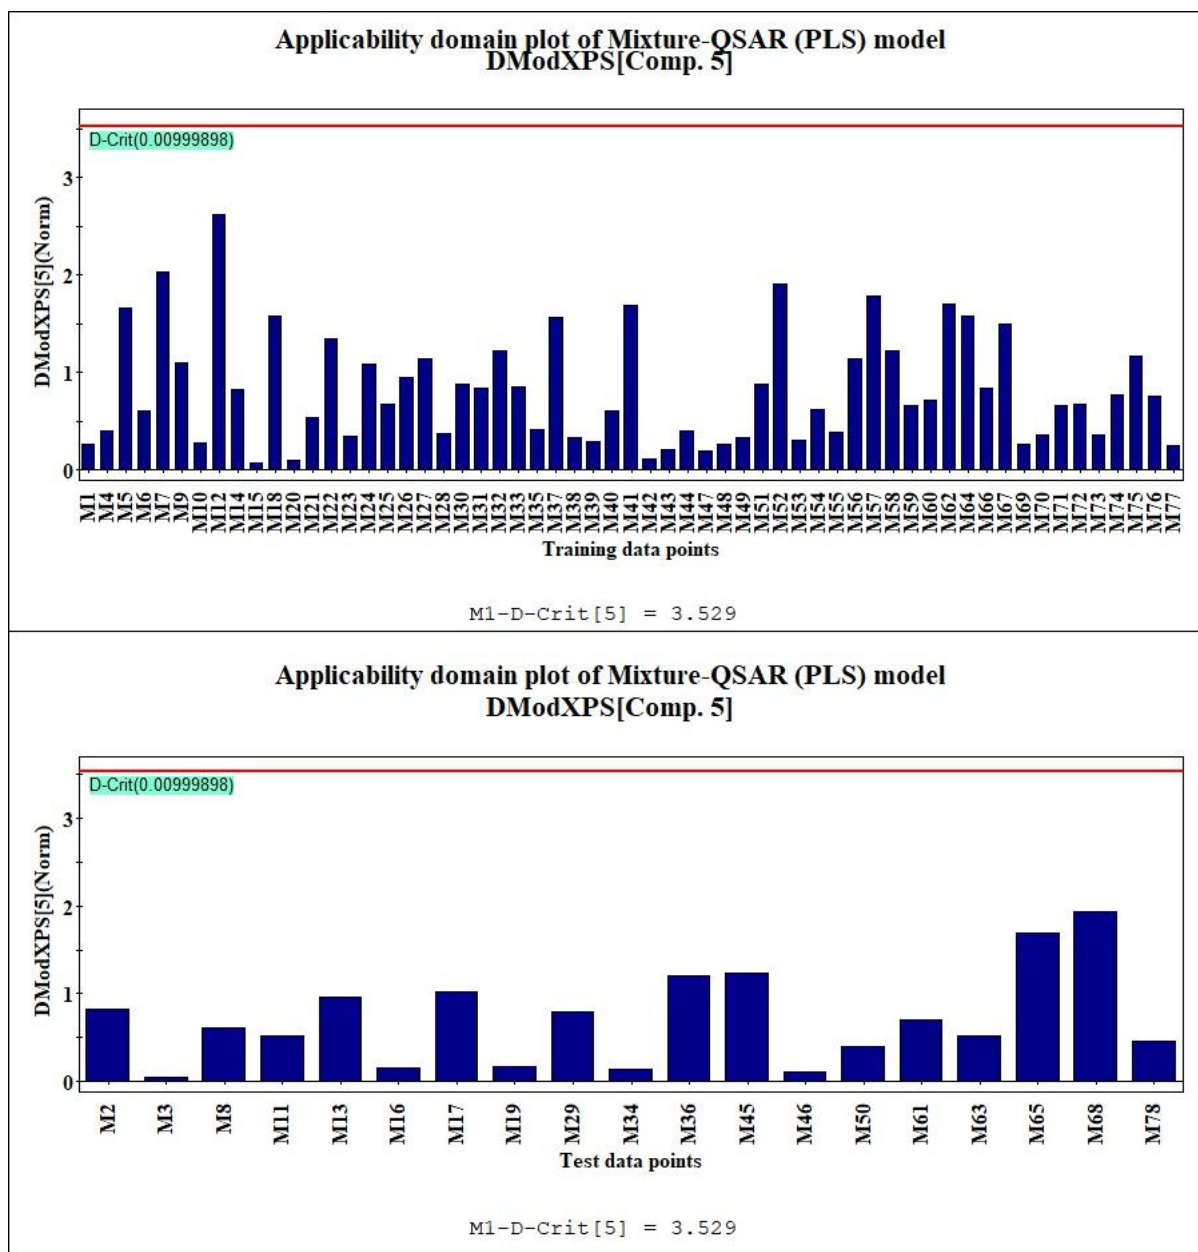

**Figure S3.** Applicability domain plot of the developed Mixture-QSAR (PLS) model
